# Supplementary material
Source: PubMed Central journal article supplement (PMC5691325)

Mineralisation  
(Pixel / vibrissae)

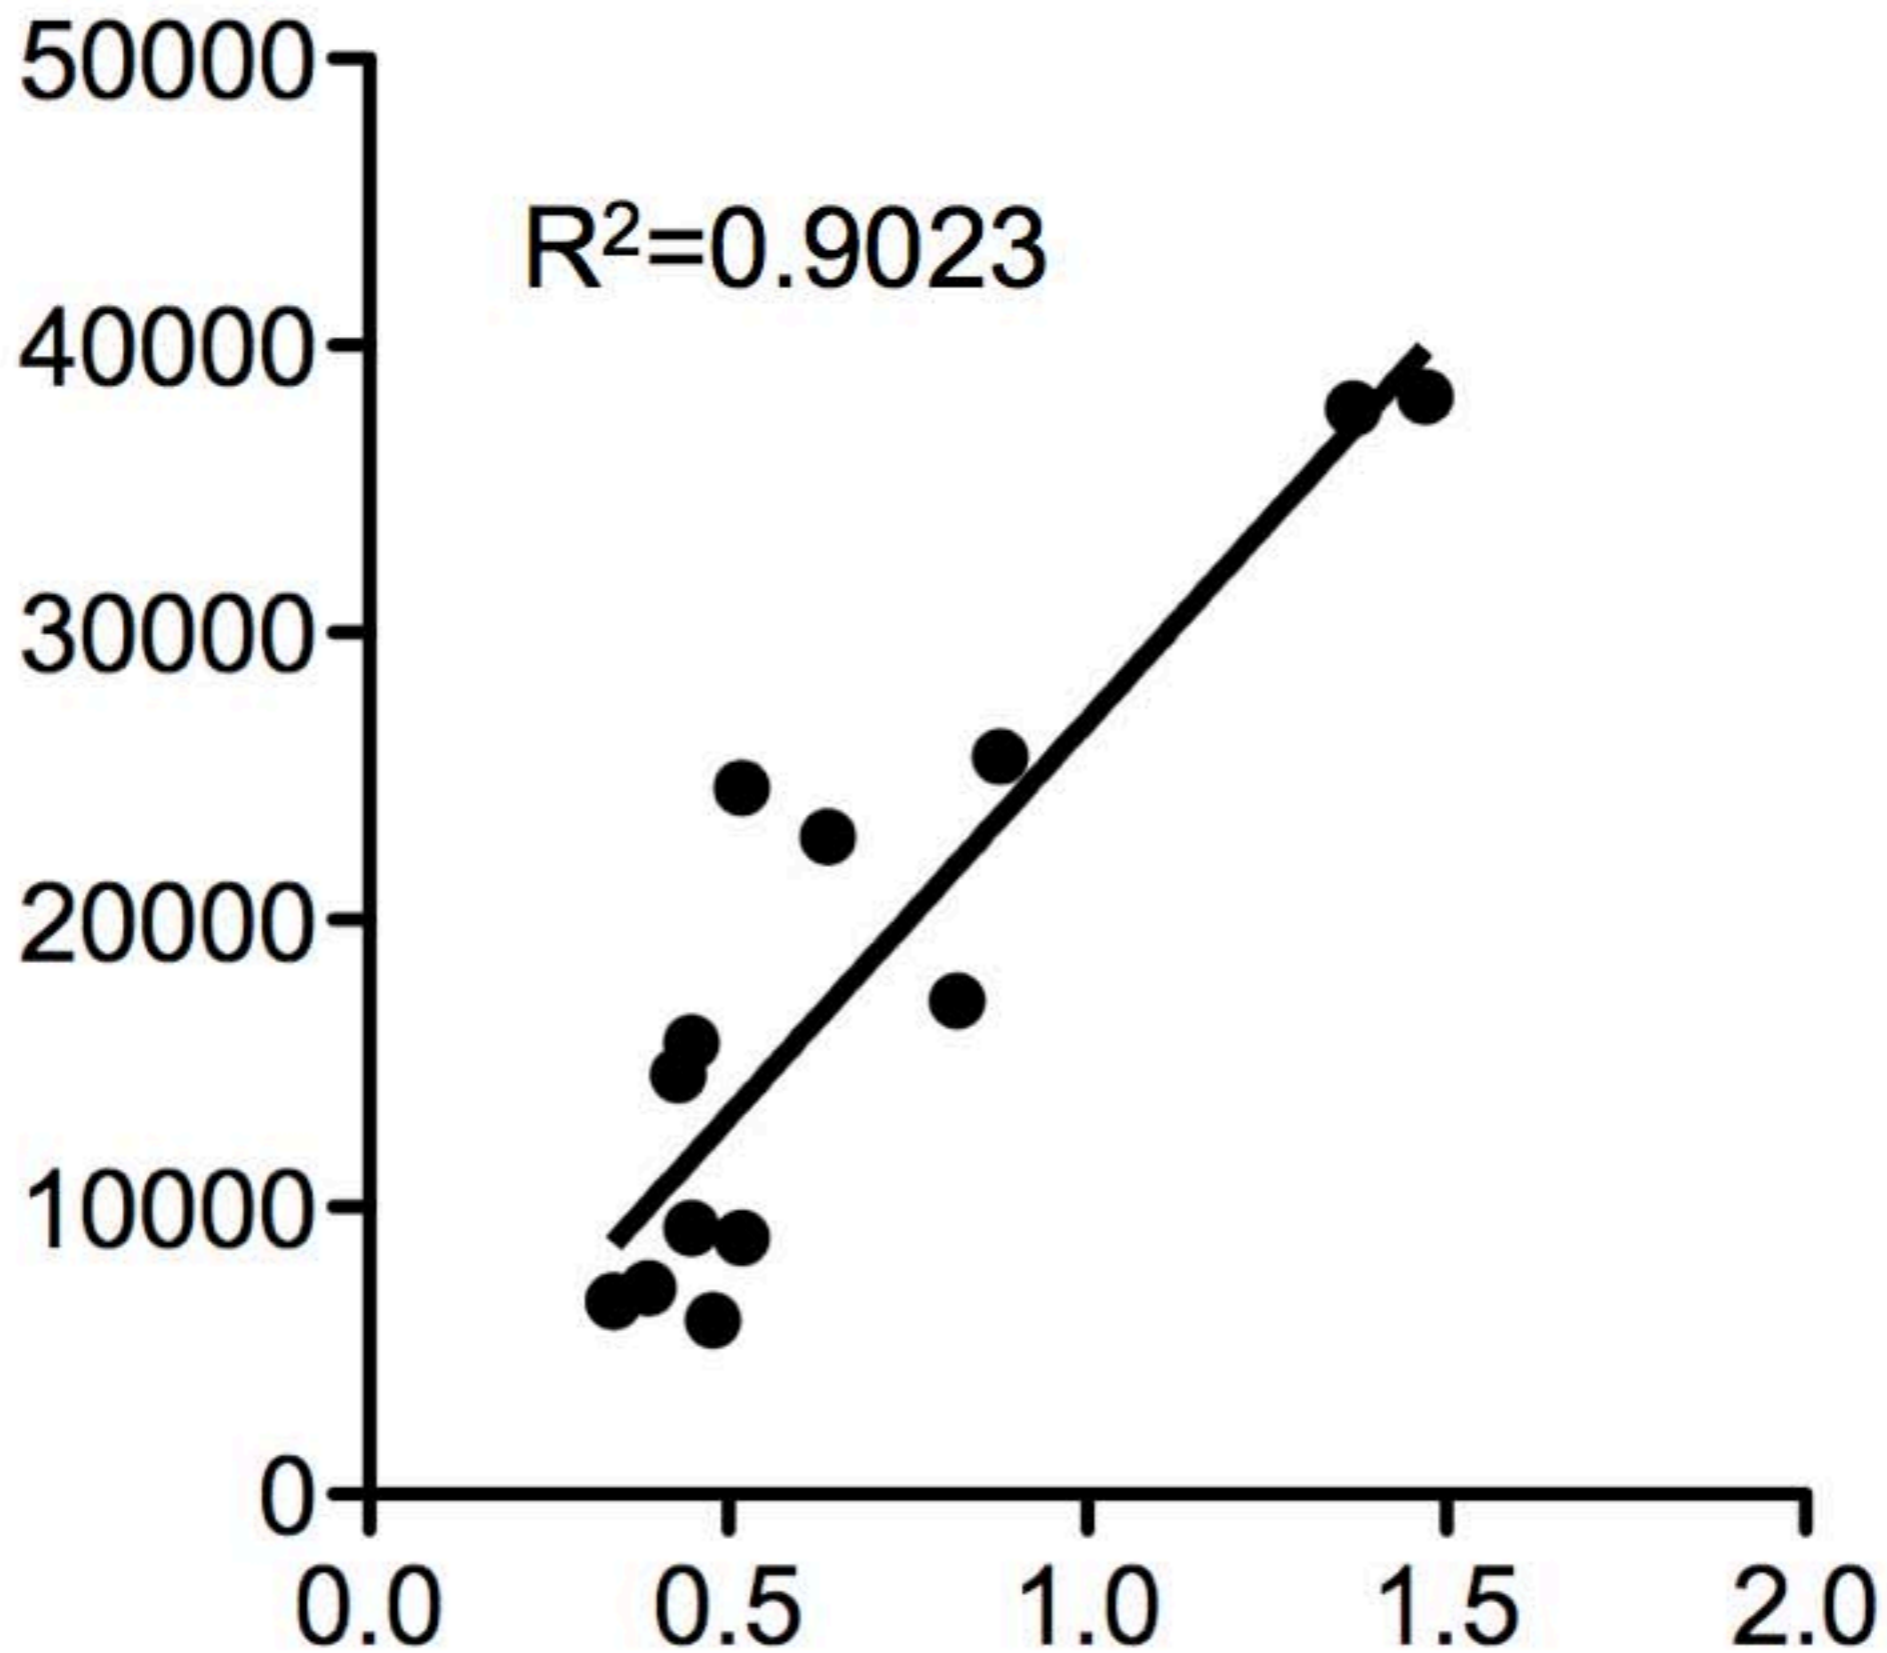

Calcium (mg / g dry vibrissae)

Supplement: mmc1.pdf [file mmc1.pdf]
